# Supplementary material for: Analysis of microRNAs in Exosomes of Breast Cancer Patients in Search of Molecular Prognostic Factors in Brain Metastases
Source: MDPI journal article supplement (doi:10.3390/ijms23073683), 2022-03-27
Supplement: s1 [file s1]

# Analysis of microRNAs in exosomes of breast cancer patients in search of molecular prognostic factors in brain metastases

Carolyn J. Curtaz <sup>1</sup>, Leonie Reifschläger <sup>2</sup>, Linus Strähle <sup>2</sup>, Jonas Feldheim <sup>3,4</sup>, Julia J. Feldheim<sup>5</sup>, Constanze Schmitt<sup>2</sup>, Matthias Kiesel<sup>1</sup>, Saskia-Laureen Herbert<sup>1</sup>, Achim Wöckel <sup>1</sup>, Patrick Meybohm <sup>2</sup> and Malgorzata Burek <sup>2,\*</sup>

## Supplementary material

**Table S1** miRNAs used in TaqMan Advanced miRNA Array Cards. Next to the miR name is the assay number (Thermo Fisher Scientific).

| miRNAs                     |
|----------------------------|
| hsa-miR-122-5p-477855_mir  |
| hsa-miR-125a-3p-477883_mir |
| hsa-miR-130a-3p-477851_mir |
| hsa-miR-132-3p-477900_mir  |
| hsa-miR-143-3p-477912_mir  |
| hsa-miR-148a-3p-477814_mir |
| hsa-miR-148b-3p-477824_mir |
| hsa-miR-150-5p-477918_mir  |
| hsa-miR-17-5p-478447_mir   |
| hsa-miR-181a-5p-477857_mir |
| hsa-miR-181b-5p-478583_mir |
| hsa-miR-185-5p-477939_mir  |
| hsa-miR-193a-5p-477954_mir |
| hsa-miR-197-3p-477959_mir  |
| hsa-miR-199a-3p-477961_mir |
| hsa-miR-20a-5p-478586_mir  |
| hsa-miR-210-3p-477970_mir  |
| hsa-miR-214-3p-477974_mir  |
| hsa-miR-21-5p-477975_mir   |
| hsa-miR-222-3p-477982_mir  |
| hsa-miR-223-3p-477983_mir  |
| hsa-miR-23a-3p-478532_mir  |
| hsa-miR-24-3p-477992_mir   |
| hsa-miR-26a-5p-477995_mir  |
| hsa-miR-27a-3p-478384_mir  |
| hsa-miR-296-5p-477836_mir  |
| hsa-miR-29a-3p-478587_mir  |
| hsa-miR-320a-478594_mir    |
| hsa-miR-32-5p-478026_mir   |
| hsa-miR-326-478027_mir     |
| hsa-miR-340-5p-478042_mir  |

hsa-miR-342-3p-478043\_mir  
 hsa-miR-410-3p-478085\_mir  
 hsa-miR-425-5p-478094\_mir  
 hsa-miR-483-5p-478432\_mir  
 hsa-miR-484-478308\_mir  
 hsa-miR-485-3p-478125\_mir  
 hsa-miR-486-5p-478128\_mir  
 hsa-miR-490-3p-478131\_mir  
 hsa-miR-491-5p-478132\_mir  
 hsa-miR-548d-5p-480870\_mir  
 hsa-miR-576-3p-478164\_mir  
 hsa-miR-598-3p-478172\_mir  
 hsa-miR-625-5p-479469\_mir  
 hsa-miR-652-3p-478189\_mir  
 hsa-miR-885-5p-478207\_mir  
 hsa-miR-92b-3p-477823\_mir  
 hsa-miR-96-5p-478215\_mir

---

**Supplementary Table S2:** miRNAs and associated targets, signaling pathways and associated diseases (italics: indirect connection, bold: direct connection).

|                                  | <b>Main target genes<br/>(TargetScan)</b>                 | <b>Related KEGG<br/>pathway</b>                                                                                                                                        | <b>HMDD v3.2</b>                                              |
|----------------------------------|-----------------------------------------------------------|------------------------------------------------------------------------------------------------------------------------------------------------------------------------|---------------------------------------------------------------|
| <b>hsa-miR-122-5p</b>            | <b>GNG13</b> , <i>ALDOA</i> ,<br>PLEKHB2, RFXAP,<br>MASP1 | <b>Pathways in cancer</b> ,<br><i>HIF-1 signaling pathway</i> ,<br>Metabolic pathways,<br>Antigen processing and<br>presentation,<br>Coronavirus disease -<br>COVID-19 | Stroke, Hepatitis B<br>Virus Infection, Sepsis                |
| <b>hsa-miR-125a-3p-<br/>AL11</b> | BOK, NIT1, MEAF6,<br>OXLD1, TRAF3IP3                      | Apoptosis                                                                                                                                                              | Rheumatoid Arthritis,<br>Heart Failure, Lung<br>Neoplasms     |
| <b>hsa-miR-130a-3p</b>           | KDM2A, <i>MDM4</i> ,<br>KLF7, ENPP5, MYBL1                | MicroRNAs in cancer,<br><i>p53 signaling pathway</i>                                                                                                                   | Thyroid Neoplasms,<br>Muscle Atrophy,<br>Epilepsy             |
| <b>hsa-miR-143-3p</b>            | C1orf74, ITM2B,<br>SLC25A15,<br>ABHD14A, SLC30A8          | Metabolic pathways                                                                                                                                                     | Colon Neoplasms,<br>Colorectal Carcinoma,<br>Lymphoma, B-Cell |
| <b>hsa-miR-148b-3p</b>           | C18orf25, S1PR1,<br>DCP2, PNRC2,<br>PTPRA                 | FoxO signaling<br>pathway, Sphingolipid<br>signaling pathway,<br>RNA degradation                                                                                       | Asthma, Anxiety<br>Disorders, Lung<br>Neoplasms               |

|                        |                                         |                                                                                                                        |                                                                   |
|------------------------|-----------------------------------------|------------------------------------------------------------------------------------------------------------------------|-------------------------------------------------------------------|
| <b>hsa-miR-150-5p</b>  | MYB, MDM4, ENSA, ADIPOR2, HILPDA        | MicroRNAs in cancer, <i>p53 signaling pathway</i> , Cellular senescence, Renin secretion                               | Lupus Vulgaris, Sepsis, Human Immunodeficiency Virus Infection    |
| <b>hsa-miR-17-5p</b>   | GPR6, HAUS8, VSX1, PKD2, NKIRAS1        | Taste transduction                                                                                                     | Leukemia, Melanoma, Endometriosis                                 |
| <b>hsa-miR-193a-5p</b> | PCDHA7, PCDHA5, CA7, SPRED3, GANAB      | Metabolic pathways, ABC transporters                                                                                   | Eosinophilic Esophagitis, Sepsis, Intrahepatic Cholangiocarcinoma |
| <b>hsa-miR-197-3p</b>  | CD53, ZIK1, RNF146, USP41, TMEM30C      | Herpes simplex virus 1 infection                                                                                       | Diabetes Mellitus Type 2, Myocardial Infarction, Lung Neoplasms   |
| <b>hsa-miR-199a-3p</b> | KLHL3, SERPINE2, TMSB4X, PAWR, NLK      | Regulation of actin cytoskeleton, <i>Adherens junction</i> , <i>MAPK signaling pathway</i>                             | Parkinson Disease, Graft-Versus-Host Disease, Chronic Hepatitis C |
| <b>hsa-miR-20a-5p</b>  | GPR137C, CYBRD1, VLDLR, CROT, COX8C     | Mineral absorption, Lipid and atherosclerosis, Pathways in cancer, <i>mTOR signaling pathway</i>                       | Leukemia, Carcinoma Hepatocellular                                |
| <b>hsa-miR-223-3p</b>  | FBXW7, RHOB, LELP1, PTS, TBC1D17        | Ubiquitin mediated proteolysis, Salmonella infection, RNA degradation                                                  | Leukemia, Lymphoblastic, Sepsis, Diabetes Mellitus, Type 2        |
| <b>hsa-miR-24-3p</b>   | SNN, FASLG, REEP2, STRADB, NFASC        | <b>Apoptosis, Pathways in cancer</b> , Proteoglycans in cancer, Cell adhesion molecules, <i>mTOR signaling pathway</i> | Lung Neoplasms, Pancreatic Neoplasms, Leukemia                    |
| <b>hsa-miR-26a-5p</b>  | STRADB, ARPP19, MAB21L1, CREBZF, ZDHHC6 | AMPK signaling pathway, <i>mTOR signaling pathway</i>                                                                  | Alzheimer Disease, Diabetic Nephropathy, Chronic Hepatitis B      |

|                        |                                            |                                                                                               |                                                                               |
|------------------------|--------------------------------------------|-----------------------------------------------------------------------------------------------|-------------------------------------------------------------------------------|
| <b>hsa-miR-296-5p</b>  | HMGA1, EPN1, RNF44, <i>TFRC</i> , TEAD3    | Endozytose, <i>HIF-1-signaling pathway</i>                                                    | Lupus Vulgaris, Atherosclerosis, Hypertension                                 |
| <b>hsa-miR-32-5p</b>   | ZFYVE21, PCOLCE2, BTLA, ANP32E, G3BP2      |                                                                                               | Lung Neoplasms, Colorectal Carcinoma, Viral Infectious Disease                |
| <b>hsa-miR-326</b>     | KCNIP2, CEP85, CTRC, SYS1, ZNF394          |                                                                                               | Multiple Sclerosis, Leukemia, Lymphoblastic, Acute; Diabetes Mellitus, Type 1 |
| <b>hsa-miR-342-3p</b>  | DTNBP1, BTN2A1, RGS4, UBE2D2, MATN1        | Protein processing in endoplasmic reticulum                                                   | Glioblastoma, Multiple Myeloma, Sepsis                                        |
| <b>hsa-miR-410-3p</b>  | NPPC, DCTN6, CBFβ, TRAPPC3, ARFIP1         | cGMP-PKG signaling pathway, Vascular smooth muscle contraction, Pathways of neurodegeneration | Stroke, Leukemia, Myeloid, Chronic; Colorectal Carcinoma                      |
| <b>hsa-miR-484</b>     | HSDL2, DBNDD2, TARBP2, CYB561D1, ARSD      |                                                                                               | Pancreatic Neoplasms, Metabolic Syndrome, Prostate Neoplasms                  |
| <b>hsa-miR-486-5p</b>  | GPX8, CSPG5, SRSF3, KIAA0226L, BTAF1       | Metabolic pathways, Herpes simplex virus 1 infection                                          | Lupus Vulgaris, Sepsis, Diabetes Mellitus, Type 2                             |
| <b>hsa-miR-490-3p</b>  | VDAC1, TMOD3, COMMD10, PROSC, HNRNPA1      | Alzheimer disease, Influenza A, Spliceosome                                                   | Colorectal Carcinoma, Chondrosarcoma, Ovarian Neoplasms                       |
| <b>hsa-miR-548d-5p</b> | TBCA, CAMLG, <i>GHRL</i> , SRP9, CBWD7     | <i>cAMP signaling pathway</i> , Protein export                                                | Chronic Hepatitis B, Glioma; Lymphoma, Non-Hodgkin                            |
| <b>hsa-miR-576-3p</b>  | NPFFR2, ZNF616, MARCH11, GIMAP7, KRTAP21-2 | Neuroactive ligand-receptor interaction, Herpes simplex virus 1 infection                     | Glioma, Melanoma, Bladder Neoplasms                                           |
| <b>hsa-miR-885-5p</b>  | GALNT3, ZNF812, ZADH2, FAM229B, NUDCD2     | Metabolic pathways                                                                            | Pancreatic Neoplasms, Alzheimer Disease, Myasthenia Gravis                    |

|                        |                                              |                                  |                                                           |
|------------------------|----------------------------------------------|----------------------------------|-----------------------------------------------------------|
| <b>hsa-miR-92b-3p-</b> | OAZ3, CHCHD10,<br>SERTAD3, MARCH4,<br>NKX2-4 | Amyotrophic lateral<br>sclerosis | Heart Failure, Bladder<br>Neoplasms, Gastric<br>Neoplasms |
|------------------------|----------------------------------------------|----------------------------------|-----------------------------------------------------------|

**Table S3** mRNAs used in TaqMan Array Cards. Next to the gene symbol, the TaqMan Assay ID is listed (Thermo Fisher Scientific).

| mRNA (gene symbol) | TaqMan assay ID |
|--------------------|-----------------|
| AARS               | Hs00609836_m1   |
| ABCC3              | Hs02513562_s1   |
| ANP32C             | Hs00606537_s1   |
| APOBEC3H           | Hs00419665_m1   |
| ATP2A1             | Hs01092284_g1   |
| CD9                | Hs01124022_m1   |
| CLEC1B             | Hs00212925_m1   |
| CLPS               | Hs02558461_s1   |
| CSF3R              | Hs01116082_g1   |
| DES                | Hs00157258_m1   |
| E2F1               | Hs00153451_m1   |
| FOS                | Hs05634922_s1   |
| GRK2               | Hs00176395_m1   |
| HSPA5              | Hs00946087_g1   |
| IFNA5              | Hs04186137_sH   |
| ITGA2B             | Hs01116228_m1   |
| ITGB3              | Hs01001469_m1   |
| ITGB5              | Hs00174435_m1   |
| KCNH2              | Hs00542479_g1   |
| KIF15              | Hs01085295_m1   |
| LHB                | Hs00751207_s1   |
| MMP14              | Hs01037006_gH   |
| MMP9               | Hs00957562_m1   |
| MT1E               | Hs01938284_g1   |
| MUC4               | Hs00366414_m1   |
| MUC5B              | Hs06629268_s1   |
| OR3A2              | Hs01635424_s1   |
| PAM16              | Hs00211426_m1   |
| PCDHGC3            | Hs00159905_m1   |
| PILRA              | Hs00603661_g1   |
| RILP               | Hs00388296_g1   |
| RIN1               | Hs00182870_m1   |
| S100A3             | Hs00161483_m1   |
| SLC24A3            | Hs00915003_m1   |
| SLC35G3            | Hs01586570_sH   |
| SLC39A3            | Hs00292942_m1   |

|           |               |
|-----------|---------------|
| SLC43A1   | Hs00992327_m1 |
| SLC7A5    | Hs01001187_m1 |
| SPC24     | Hs00699347_m1 |
| TGFB1I1   | Hs00901623_g1 |
| THBS1     | Hs00962908_m1 |
| TNFAIP3   | Hs00234713_m1 |
| TNFRSF10C | Hs00182570_m1 |
| TREM1     | Hs00218624_m1 |
| TUBB1     | Hs00917771_g1 |
| VCX       | Hs03645839_gH |
| VEGFA     | Hs00900055_m1 |

---

Figure S1

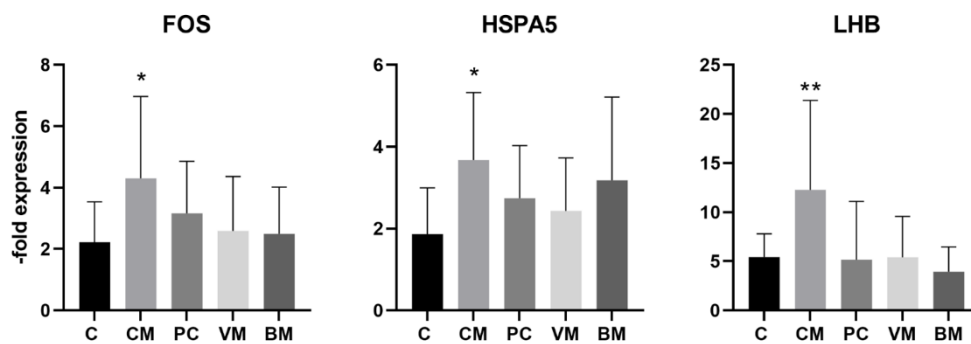

Expression levels of exosomal mRNAs.
